# Supplementary material for: Home-use Photobiomodulation Device Treatment Outcomes for COVID-19
Source: bioRxiv or medRxiv preprint supplement (doi:10.1101/2022.06.16.22276503), 2022-06-17

## **Supplement 9**

### **Oxygen Saturation Analysis**

#### **Table of Contents**

9.1 Summary of Oxygen Saturation Analysis

9.2 Mixed Model Repeated Measures Analysis of Covariance Treatment Comparison of Oxygen Saturation (%) in in All Patients with Oxygen Saturation Data from Enrollment

9.3 Chart of Change in Oxygen Levels with Standard Error Bars

## **Supplement 9.1**

### **Summary of Oxygen Saturation Analysis**

#### **Introduction**

We used the Mixed Model of Repeated Measures Analysis of Covariance (MMRM) model to analyze the oxygen saturation levels (SpO<sub>2</sub>) on the change from baseline in oxygen saturation (%) on days 7, 14, 21 and 28. Model terms include treatment, day, treatment-by-day interaction, symptom duration days and Baseline/Screening covariate.

All available data in percentage changes in SpO<sub>2</sub> levels were read from Enrollment (n=267) as part of the safety monitoring. The loss of some patients who improved by Day 1 of treatment, and not considered for efficacy analyses, had no bearing on this exercise Least-square (LS) means for Treatment and Control and the differences between treatments included the 95% confidence interval (CI).

#### **Results**

Supplement 9.2 presents MMRM comparison of SpO<sub>2</sub> percentage in the change from Enrollment in all patients with SpO<sub>2</sub> data. Among 232 out of 267 patients with available SpO<sub>2</sub> data, the LS mean difference of 0.32 % was statistically significant (P-value 0.018). in favor of the device.

The Chart on Changes in Oxygen Levels with Standard Error Bars is presented in Supplement 9.3.

#### **Conclusion**

In tracking SpO<sub>2</sub> level changes of all patients from Enrollment, the Treatment group produced statistically significant (P=0.018) improvements.

**Supplement 9.2**

**Mixed Model Repeated Measures Analysis of Covariance  
Treatment Comparison of Oxygen Saturation (%) in the Change  
in All Patients with Oxygen Saturation Data from Enrollment**

| Treatment Estimate Change from Enrollment |     |         |           |        |       | Treatment Comparison Change from Enrollment |           |        |       |         |
|-------------------------------------------|-----|---------|-----------|--------|-------|---------------------------------------------|-----------|--------|-------|---------|
| Treatment                                 | N   | LS Mean | Std Error | 95% CI |       | Difference                                  |           | 95% CI |       | P-Value |
|                                           |     |         |           | Lower  | Upper | LS Mean                                     | Std Error | Lower  | Upper |         |
| Treatment                                 | 117 | 0.54    | 0.098     | 0.35   | 0.73  |                                             |           |        |       |         |
| Control                                   | 115 | 0.22    | 0.1       | 0.02   | 0.41  |                                             |           |        |       |         |
| Difference                                | 232 |         |           |        |       | 0.32                                        | 0.134     | 0.05   | 0.58  | 0.018*  |

\*p<0.05 by mixed model repeated measures analysis of covariance for the change from Enrollment in oxygen saturation (%) to days 7, 14, 21 and 28.

Model terms include treatment (Treatment, Control), day (7,14,21,28), treatment-by-day interaction, symptoms duration days on Enrollment (0-5, 6-10) and oxygen on Enrollment

saturation. Least-squares (LS) mean, 95% confidence interval (CI)

04APR22,T08\_o2sat\_all

## Supplement 9.3

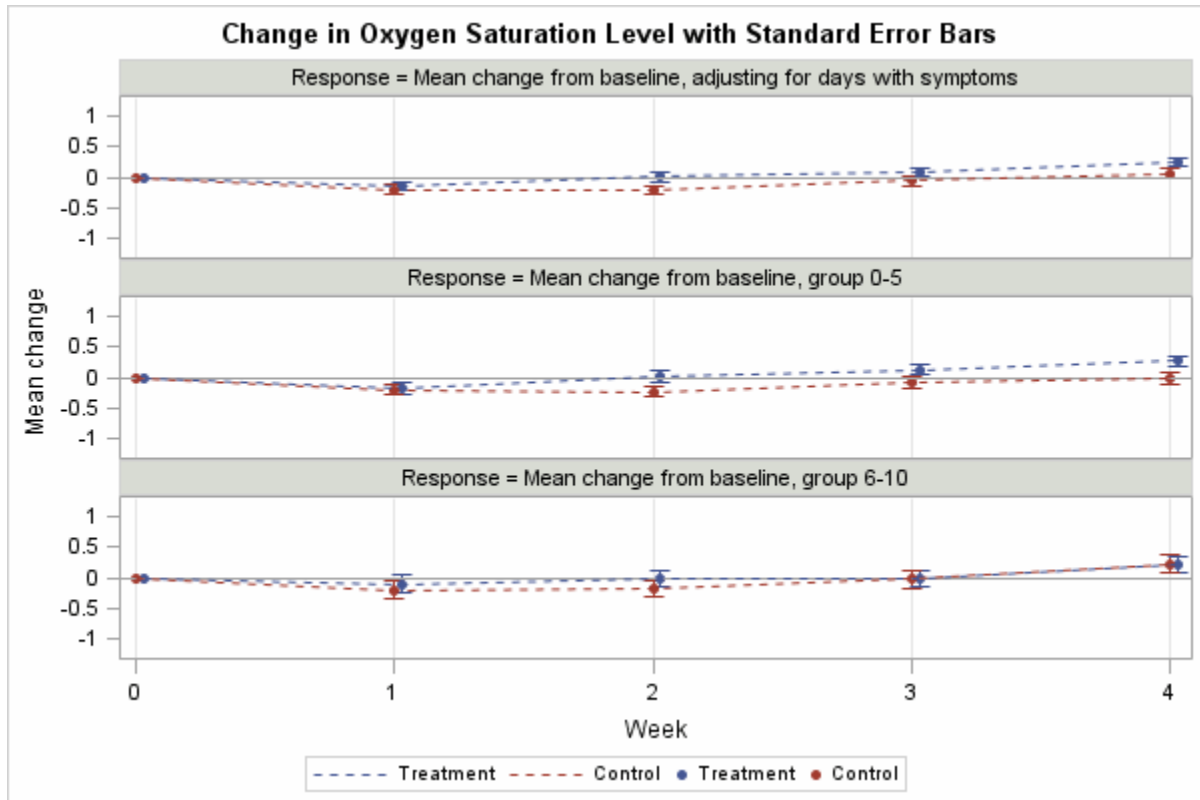

Supplement: Supplementary file [file media-10.pdf]
