# Supplementary material for: Home-use Photobiomodulation Device Treatment Outcomes for COVID-19
Source: bioRxiv or medRxiv preprint supplement (doi:10.1101/2022.06.16.22276503), 2022-06-17
Supplement: Supplementary file [file media-3.pdf]

## Supplement 2

### Treatment Device, Vielight RX Plus Specifications

#### Concept of RX Plus design:

1. A movable 810 nm LED module can be positioned on the thymus gland and sternum at the same time.
2. An intranasal diode of visible red 633 nm wavelength added to introduce light into the nasal cavity.

#### Movable LED module applicator:

Wavelength: 810 nm, non-laser

Waveform: continuous wave

Beam spot size upon contact  $\approx 1 \text{ cm}^2$

Treatment time: 20 minutes

Power output density on the skin surface = 50 mW/cm

Energy dose density on skin surface =  $50 \times 20 \times 60 / 1000 = 60 \text{ J/cm}^2$

#### Nasal applicator LED:

Wavelength: 633 nm

Waveform: continuous wave

Beam spot size upon contact  $\approx 1 \text{ cm}^2$

Treatment time: 20 minutes

Power output density to mucosa = 6.5 mW/cm<sup>2</sup> .

Energy dose density to mucosa =  $8 \times 20 \times 60 / 1000 = 9.6 \text{ J/cm}^2$

**Total energy dose to surface tissues:  $60 + 9.6 = 69.6 \text{ J/cm}^2$**

Dated: June 1, 2020
