# Supplementary material for: Home-use Photobiomodulation Device Treatment Outcomes for COVID-19
Source: bioRxiv or medRxiv preprint supplement (doi:10.1101/2022.06.16.22276503), 2022-06-17
Supplement: Supplementary file [file media-8.pdf]

## **Supplement 7**

### **Cox Proportional Hazards Estimates**

#### **Table of Contents**

7.1 Full Table for Cox Proportional Hazards Estimates

7.2 Patient Demographics and Baseline Characteristics Response to Treatment - Univariate Cox Proportional Hazards Model in Symptom Duration 0-5 Days at Screening with Baseline Score of 4-7 for WURSS Question 1

## Supplement 7.1

### Full Table for Cox Proportional Hazards Estimates

#### Success Criteria Event by Treatment Group in Patients with WURSS-44 Q1 Score of 4-7

| WURSS Questionnaire Item         | Symptom Days on Enrollment | N   | Hazard Ratio | 95% Confidence Interval |       | P-Value |
|----------------------------------|----------------------------|-----|--------------|-------------------------|-------|---------|
|                                  |                            |     |              | Lower                   | Upper |         |
| 01: How sick do you feel today?  | 0-5d                       | 136 | 1.495        | 0.996                   | 2.243 | 0.052   |
|                                  | 6-10d                      | 63  | 0.803        | 0.425                   | 1.517 | 0.499   |
|                                  | 0-10d                      | 199 | 1.252        | 0.888                   | 1.764 | 0.199   |
| 02: Cough                        | 0-5d                       | 82  | 1.166        | 0.693                   | 1.961 | 0.562   |
|                                  | 6-10d                      | 36  | 0.726        | 0.319                   | 1.654 | 0.446   |
|                                  | 0-10d                      | 118 | 1.02         | 0.658                   | 1.58  | 0.931   |
| 03: Coughing stuff up            | 0-5d                       | 40  | 1.816        | 0.875                   | 3.767 | 0.109   |
|                                  | 6-10d                      | 19  | 1.819        | 0.684                   | 4.837 | 0.230   |
|                                  | 0-10d                      | 59  | 1.817        | 1.013                   | 3.261 | 0.045*  |
| 04: Cough interfering with sleep | 0-5d                       | 33  | 2.02         | 0.929                   | 4.392 | 0.076   |
|                                  | 6-10d                      | 15  | 1.273        | 0.399                   | 4.062 | 0.684   |
|                                  | 0-10d                      | 48  | 1.752        | 0.929                   | 3.303 | 0.083   |
| 05: Soar throat                  | 0-5d                       | 40  | 1.504        | 0.726                   | 3.114 | 0.272   |
|                                  | 6-10d                      | 19  | 1.065        | 0.382                   | 2.968 | 0.904   |
|                                  | 0-10d                      | 59  | 1.339        | 0.747                   | 2.399 | 0.327   |
| 06: Scratchy throat              | 0-5d                       | 36  | 1.436        | 0.679                   | 3.039 | 0.344   |
|                                  | 6-10d                      | 15  | 0.543        | 0.155                   | 1.9   | 0.339   |
|                                  | 0-10d                      | 51  | 1.102        | 0.585                   | 2.075 | 0.764   |
| 07: Hoarseness                   | 0-5d                       | 38  | 1.212        | 0.595                   | 2.47  | 0.596   |
|                                  | 6-10d                      | 18  | 2.56         | 0.884                   | 7.414 | 0.083   |

|                      |       |     |       |       |        |        |
|----------------------|-------|-----|-------|-------|--------|--------|
|                      | 0-10d | 56  | 1.521 | 0.839 | 2.759  | 0.167  |
| 08: Runny nose       | 0-5d  | 44  | 0.831 | 0.423 | 1.634  | 0.592  |
|                      | 6-10d | 17  | 3.619 | 0.924 | 14.179 | 0.065  |
|                      | 0-10d | 61  | 1.151 | 0.627 | 2.11   | 0.650  |
| 09: Plugged nose     | 0-5d  | 63  | 1.338 | 0.756 | 2.368  | 0.317  |
|                      | 6-10d | 26  | 0.986 | 0.417 | 2.335  | 0.975  |
|                      | 0-10d | 89  | 1.22  | 0.758 | 1.964  | 0.412  |
| 10: Sneezing         | 0-5d  | 39  | 1.777 | 0.862 | 3.663  | 0.119  |
|                      | 6-10d | 16  | 2.478 | 0.531 | 11.569 | 0.248  |
|                      | 0-10d | 55  | 1.896 | 0.99  | 3.628  | 0.054  |
| 11: Headache         | 0-5d  | 90  | 2.027 | 1.216 | 3.378  | 0.007* |
|                      | 6-10d | 38  | 0.824 | 0.361 | 1.879  | 0.645  |
|                      | 0-10d | 128 | 1.586 | 1.036 | 2.429  | 0.034* |
| 12: Body aches       | 0-5d  | 85  | 1.641 | 0.996 | 2.704  | 0.052  |
|                      | 6-10d | 34  | 1.681 | 0.767 | 3.684  | 0.195  |
|                      | 0-10d | 119 | 1.652 | 1.084 | 2.519  | 0.020* |
| 13: Feeling run down | 0-5d  | 122 | 1.306 | 0.833 | 2.049  | 0.244  |
|                      | 6-10d | 54  | 0.506 | 0.245 | 1.046  | 0.066  |
|                      | 0-10d | 176 | 0.998 | 0.683 | 1.458  | 0.991  |
| 14: Sweats           | 0-5d  | 57  | 1.277 | 0.731 | 2.228  | 0.390  |
|                      | 6-10d | 21  | 1.129 | 0.456 | 2.799  | 0.793  |
|                      | 0-10d | 78  | 1.234 | 0.768 | 1.982  | 0.384  |
| 15: Chills           | 0-5d  | 44  | 0.674 | 0.355 | 1.279  | 0.227  |
|                      | 6-10d | 17  | 1.484 | 0.496 | 4.436  | 0.480  |
|                      | 0-10d | 61  | 0.827 | 0.468 | 1.461  | 0.513  |
| 16: Feeling feverish | 0-5d  | 44  | 1.439 | 0.742 | 2.79   | 0.281  |
|                      | 6-10d | 17  | 1.09  | 0.362 | 3.284  | 0.878  |
|                      | 0-10d | 61  | 1.338 | 0.76  | 2.358  | 0.313  |
| 17: Feeling dizzy    | 0-5d  | 59  | 1.418 | 0.796 | 2.524  | 0.236  |
|                      | 6-10d | 25  | 0.923 | 0.363 | 2.343  | 0.866  |

|                    |       |     |       |       |        |        |
|--------------------|-------|-----|-------|-------|--------|--------|
|                    | 0-10d | 84  | 1.261 | 0.768 | 2.07   | 0.359  |
| 18: Feeling tired  | 0-5d  | 125 | 1.09  | 0.677 | 1.755  | 0.723  |
|                    | 6-10d | 54  | 0.432 | 0.192 | 0.972  | 0.043* |
|                    | 0-10d | 179 | 0.849 | 0.566 | 1.275  | 0.431  |
| 19: Irritability   | 0-5d  | 68  | 1.717 | 0.947 | 3.114  | 0.075  |
|                    | 6-10d | 29  | 0.957 | 0.395 | 2.319  | 0.923  |
|                    | 0-10d | 97  | 1.438 | 0.874 | 2.367  | 0.153  |
| 20: Sinus pain     | 0-5d  | 60  | 1.926 | 1.074 | 3.452  | 0.028* |
|                    | 6-10d | 21  | 2.26  | 0.792 | 6.452  | 0.128  |
|                    | 0-10d | 81  | 2.001 | 1.203 | 3.328  | 0.008* |
| 21: Sinus pressure | 0-5d  | 65  | 1.702 | 0.952 | 3.044  | 0.073  |
|                    | 6-10d | 28  | 0.906 | 0.368 | 2.234  | 0.831  |
|                    | 0-10d | 93  | 1.415 | 0.865 | 2.314  | 0.167  |
| 22: Sinus drainage | 0-5d  | 40  | 2.158 | 0.994 | 4.687  | 0.052  |
|                    | 6-10d | 15  | 2.077 | 0.526 | 8.198  | 0.297  |
|                    | 0-10d | 55  | 2.138 | 1.088 | 4.203  | 0.028* |
| 23: Swollen glands | 0-5d  | 33  | 2.436 | 1.046 | 5.676  | 0.039* |
|                    | 6-10d | 10  | 0.39  | 0.045 | 3.352  | 0.391  |
|                    | 0-10d | 43  | 1.764 | 0.861 | 3.616  | 0.121  |
| 24: Plugged ears   | 0-5d  | 29  | 1.542 | 0.673 | 3.532  | 0.306  |
|                    | 6-10d | 13  | 2.839 | 0.681 | 11.831 | 0.152  |
|                    | 0-10d | 42  | 1.812 | 0.895 | 3.67   | 0.099  |
| 25: Ear discomfort | 0-5d  | 28  | 2.39  | 0.937 | 6.097  | 0.068  |
|                    | 6-10d | 17  | 2.217 | 0.653 | 7.527  | 0.202  |
|                    | 0-10d | 45  | 2.325 | 1.104 | 4.893  | 0.026* |
| 26: Watery eyes    | 0-5d  | 12  | 2.934 | 0.72  | 11.954 | 0.133  |
|                    | 6-10d | 12  | 1.45  | 0.291 | 7.22   | 0.650  |
|                    | 0-10d | 24  | 2.218 | 0.749 | 6.565  | 0.150  |
| 27: Eye discomfort | 0-5d  | 23  | 0.747 | 0.298 | 1.869  | 0.533  |
|                    | 6-10d | 12  | 0.594 | 0.154 | 2.29   | 0.449  |

|                        |       |     |       |       |        |        |
|------------------------|-------|-----|-------|-------|--------|--------|
|                        | 0-10d | 35  | 0.695 | 0.323 | 1.492  | 0.350  |
| 28: Head congestion    | 0-5d  | 71  | 0.873 | 0.48  | 1.586  | 0.655  |
|                        | 6-10d | 30  | 1.132 | 0.459 | 2.792  | 0.787  |
|                        | 0-10d | 101 | 0.944 | 0.574 | 1.553  | 0.822  |
| 29: Chest congestion   | 0-5d  | 59  | 1.847 | 1.008 | 3.384  | 0.047* |
|                        | 6-10d | 19  | 1.985 | 0.659 | 5.984  | 0.223  |
|                        | 0-10d | 78  | 1.878 | 1.105 | 3.193  | 0.020* |
| 30: Chest tightness    | 0-5d  | 46  | 1.247 | 0.599 | 2.593  | 0.555  |
|                        | 6-10d | 27  | 1.297 | 0.552 | 3.048  | 0.551  |
|                        | 0-10d | 73  | 1.268 | 0.727 | 2.211  | 0.403  |
| 31: Heaviness in chest | 0-5d  | 46  | 1.386 | 0.682 | 2.815  | 0.367  |
|                        | 6-10d | 24  | 0.819 | 0.344 | 1.953  | 0.653  |
|                        | 0-10d | 70  | 1.127 | 0.652 | 1.951  | 0.668  |
| 32: Lack of energy     | 0-5d  | 118 | 1.211 | 0.737 | 1.988  | 0.450  |
|                        | 6-10d | 52  | 0.459 | 0.207 | 1.016  | 0.055  |
|                        | 0-10d | 170 | 0.916 | 0.603 | 1.392  | 0.681  |
| 33: Loss of appetite   | 0-5d  | 74  | 1.202 | 0.705 | 2.052  | 0.499  |
|                        | 6-10d | 30  | 0.87  | 0.382 | 1.979  | 0.739  |
|                        | 0-10d | 104 | 1.093 | 0.697 | 1.714  | 0.699  |
| 34: Think clearly      | 0-5d  | 59  | 2.067 | 1.093 | 3.909  | 0.025* |
|                        | 6-10d | 26  | 1.514 | 0.563 | 4.072  | 0.411  |
|                        | 0-10d | 85  | 1.893 | 1.103 | 3.248  | 0.021* |
| 35: Speak clearly      | 0-5d  | 31  | 1.194 | 0.473 | 3.01   | 0.708  |
|                        | 6-10d | 16  | 2.797 | 0.734 | 10.657 | 0.132  |
|                        | 0-10d | 47  | 1.609 | 0.768 | 3.369  | 0.208  |
| 36: Sleep well         | 0-5d  | 75  | 1.453 | 0.823 | 2.566  | 0.197  |
|                        | 6-10d | 33  | 0.858 | 0.34  | 2.165  | 0.746  |
|                        | 0-10d | 108 | 1.261 | 0.777 | 2.046  | 0.348  |
| 37: Breathe easily     | 0-5d  | 64  | 1.535 | 0.832 | 2.833  | 0.170  |
|                        | 6-10d | 30  | 0.915 | 0.373 | 2.243  | 0.846  |

|                                  |       |     |       |       |       |       |
|----------------------------------|-------|-----|-------|-------|-------|-------|
|                                  | 0-10d | 94  | 1.301 | 0.791 | 2.14  | 0.301 |
| 38: Walk, climb stairs, exercise | 0-5d  | 86  | 1.313 | 0.779 | 2.213 | 0.307 |
|                                  | 6-10d | 39  | 0.756 | 0.313 | 1.826 | 0.534 |
|                                  | 0-10d | 125 | 1.136 | 0.725 | 1.782 | 0.577 |
| 39: Accomplish daily activities  | 0-5d  | 90  | 1.336 | 0.802 | 2.227 | 0.266 |
|                                  | 6-10d | 39  | 0.858 | 0.372 | 1.98  | 0.719 |
|                                  | 0-10d | 129 | 1.186 | 0.767 | 1.834 | 0.443 |
| 40: Work outside the home        | 0-5d  | 88  | 1.315 | 0.784 | 2.205 | 0.299 |
|                                  | 6-10d | 39  | 0.855 | 0.383 | 1.911 | 0.702 |
|                                  | 0-10d | 127 | 1.162 | 0.75  | 1.8   | 0.502 |
| 41: Work inside the home         | 0-5d  | 86  | 1.313 | 0.786 | 2.193 | 0.298 |
|                                  | 6-10d | 39  | 1.042 | 0.468 | 2.323 | 0.919 |
|                                  | 0-10d | 125 | 1.228 | 0.797 | 1.892 | 0.352 |
| 42: Interact with others         | 0-5d  | 89  | 1.225 | 0.752 | 1.996 | 0.415 |
|                                  | 6-10d | 38  | 1.033 | 0.49  | 2.176 | 0.932 |
|                                  | 0-10d | 127 | 1.164 | 0.774 | 1.753 | 0.466 |
| 43: Live your personal life      | 0-5d  | 96  | 1.451 | 0.879 | 2.397 | 0.146 |
|                                  | 6-10d | 40  | 0.839 | 0.388 | 1.816 | 0.656 |
|                                  | 0-10d | 136 | 1.233 | 0.81  | 1.878 | 0.328 |

\*p<0.05 by proportional hazards maximum likelihood estimate for 0-5d and 6-10d, and stratified MLE estimate for 0-10d symptom days.

Success (event) criteria defined as first day of 3 consecutive days of a zero score (does not have this symptom, not at all).

17MAR22, T04\_cox

## Supplement 7.2

### Patient Demographics and Baseline Characteristics Response to Treatment Univariate Cox Proportional Hazards Model in Symptom Duration 0-5 Days on Enrollment with Baseline Score of 4-7 for WURSS Question 1

| Subgroup        | N   | Hazard Ratio | 95% Confidence Interval |        | P-Value |
|-----------------|-----|--------------|-------------------------|--------|---------|
|                 |     |              | Lower                   | Upper  |         |
| Male            | 93  | 1.572        | 0.959                   | 2.576  | 0.073   |
| Female          | 43  | 1.359        | 0.664                   | 2.781  | 0.401   |
| Caucasian       | 114 | 1.609        | 1.029                   | 2.517  | 0.037*  |
| Non-Caucasian   | 22  | 1.112        | 0.415                   | 2.974  | 0.833   |
| Age >30         | 87  | 2.229        | 1.291                   | 3.848  | 0.004*  |
| Age <=30        | 49  | 0.731        | 0.392                   | 1.363  | 0.325   |
| Age >35 median  | 67  | 1.99         | 1.078                   | 3.675  | 0.028*  |
| Age <=35 median | 69  | 1.135        | 0.658                   | 1.958  | 0.649   |
| Age >40         | 51  | 1.789        | 0.879                   | 3.641  | 0.109   |
| Age <=40        | 85  | 1.414        | 0.857                   | 2.332  | 0.175   |
| Age >50         | 18  | 1.492        | 0.436                   | 5.105  | 0.523   |
| Age <=50        | 118 | 1.514        | 0.984                   | 2.331  | 0.059   |
| Age >60         | 6   | 1.165        | 0.119                   | 11.389 | 0.896   |
| Age <=60        | 130 | 1.517        | 1.003                   | 2.296  | 0.049*  |
| USA Site        | 128 | 1.506        | 0.995                   | 2.279  | 0.053   |
| Canada Site     | 8   | 2.24         | 0.231                   | 21.713 | 0.486   |
| Former Smoker   | 22  | 1.522        | 0.525                   | 4.412  | 0.439   |
| Non-Smoker      | 114 | 1.502        | 0.968                   | 2.331  | 0.070   |
| Screen 4 or 5   | 44  | 1.532        | 0.71                    | 3.307  | 0.277   |
| Screen 6 or 7   | 92  | 1.499        | 0.928                   | 2.421  | 0.098   |

|                        |    |       |       |       |        |
|------------------------|----|-------|-------|-------|--------|
| BMI 24+                | 88 | 1.819 | 1.102 | 3.001 | 0.019* |
| BMI <24                | 48 | 1.029 | 0.508 | 2.085 | 0.936  |
| BMI 27+ Obese          | 63 | 1.939 | 1.08  | 3.482 | 0.027* |
| BMI <27 Non-obese      | 73 | 1.189 | 0.676 | 2.09  | 0.548  |
| BMI 30+ Very obese     | 37 | 2.233 | 1.009 | 4.942 | 0.048* |
| BMI <30 Not very obese | 99 | 1.29  | 0.803 | 2.073 | 0.292  |

\*p<0.05 by proportional hazards maximum likelihood estimate.

17MAR22

Success (event) criteria defined as first day of 3 consecutive days of a zero score (does not have this symptom, not at all).
