# Supplementary material for: Home-use Photobiomodulation Device Treatment Outcomes for COVID-19
Source: bioRxiv or medRxiv preprint supplement (doi:10.1101/2022.06.16.22276503), 2022-06-17
Supplement: Supplementary file [file media-9.pdf]

## Supplement 8

### Full Table of Analysis of Variance for Days of Mild Symptoms Comparison of Days with WURSS-44 Scores of 0-3 for All Symptoms in Patients with Baseline WURSS-44 Q1 Score of 4-7

| Questionnaire Item              | Symptom Days | Treatment  | N   | LS Mean | Std Error | 95% c.i. |       | Treatment Comparison |           |          |       |         |  |
|---------------------------------|--------------|------------|-----|---------|-----------|----------|-------|----------------------|-----------|----------|-------|---------|--|
|                                 |              |            |     |         |           | Lower    | Upper | Difference           |           | 95% c.i. |       | P-Value |  |
|                                 |              |            |     |         |           |          |       | LS Mean              | Std Error | Lower    | Upper |         |  |
| 01: How sick do you feel today? | 0-5          | Treatment  | 68  | 23.78   | 0.77      | 22.25    | 25.31 |                      |           |          |       |         |  |
|                                 |              | Control    | 68  | 22.78   | 0.77      | 21.25    | 24.31 |                      |           |          |       |         |  |
|                                 |              | Difference | 136 |         |           |          |       | 1.00                 | 1.09      | -1.16    | 3.16  | 0.362   |  |
|                                 | 5-10         | Treatment  | 32  | 22.84   | 1.40      | 20.05    | 25.64 |                      |           |          |       |         |  |
|                                 |              | Control    | 31  | 22.06   | 1.42      | 19.23    | 24.90 |                      |           |          |       |         |  |
|                                 |              | Difference | 63  |         |           |          |       | 0.78                 | 1.99      | -3.20    | 4.76  | 0.697   |  |
|                                 | 0-10         | Treatment  | 100 | 23.33   | 0.71      | 21.93    | 24.74 |                      |           |          |       |         |  |
|                                 |              | Control    | 99  | 22.40   | 0.72      | 20.99    | 23.82 |                      |           |          |       |         |  |
|                                 |              | Difference | 199 |         |           |          |       | 0.93                 | 0.97      | -0.99    | 2.85  | 0.341   |  |
| 02: Cough                       | 0-5          | Treatment  | 44  | 24.52   | 0.88      | 22.77    | 26.27 |                      |           |          |       |         |  |
|                                 |              | Control    | 38  | 22.42   | 0.95      | 20.54    | 24.30 |                      |           |          |       |         |  |
|                                 |              | Difference | 82  |         |           |          |       | 2.10                 | 1.29      | -0.47    | 4.67  | 0.108   |  |
|                                 | 5-10         | Treatment  | 18  | 23.22   | 1.90      | 19.37    | 27.08 |                      |           |          |       |         |  |
|                                 |              | Control    | 18  | 20.67   | 1.90      | 16.81    | 24.52 |                      |           |          |       |         |  |
|                                 |              | Difference | 36  |         |           |          |       | 2.56                 | 2.68      | -2.89    | 8.01  | 0.347   |  |
|                                 | 0-10         | Treatment  | 62  | 23.83   | 0.88      | 22.09    | 25.56 |                      |           |          |       |         |  |
|                                 |              | Control    | 56  | 21.59   | 0.90      | 19.79    | 23.38 |                      |           |          |       |         |  |
|                                 |              | Difference | 118 |         |           |          |       | 2.24                 | 1.21      | -0.15    | 4.63  | 0.066   |  |
| 03: Coughing stuff up           | 0-5          | Treatment  | 17  | 23.71   | 1.63      | 20.41    | 27.00 |                      |           |          |       |         |  |
|                                 |              | Control    | 23  | 22.17   | 1.40      | 19.34    | 25.01 |                      |           |          |       |         |  |
|                                 |              | Difference | 40  |         |           |          |       | 1.53                 | 2.15      | -2.82    | 5.88  | 0.480   |  |
|                                 | 5-10         | Treatment  | 10  | 25.60   | 1.77      | 21.86    | 29.34 |                      |           |          |       |         |  |
|                                 |              | Control    | 9   | 21.56   | 1.87      | 17.61    | 25.50 |                      |           |          |       |         |  |
|                                 |              | Difference | 19  |         |           |          |       | 4.04                 | 2.58      | -1.39    | 9.48  | 0.135   |  |
|                                 | 0-10         | Treatment  | 27  | 24.49   | 1.25      | 21.99    | 26.99 |                      |           |          |       |         |  |
|                                 |              | Control    | 32  | 22.14   | 1.19      | 19.75    | 24.52 |                      |           |          |       |         |  |
|                                 |              | Difference | 59  |         |           |          |       | 2.35                 | 1.67      | -1.00    | 5.70  | 0.165   |  |

---

\*p<0.05 by one-way ANOVA within symptom day strata (0-5, 6-10) and ANOVA with factors treatment and strata for 0-10 days.  
17MAR22,T05\_mild

## Supplement 8

### Full Table of Analysis of Variance for Days of Mild Symptoms Comparison of Days with WURSS-44 Scores of 0-3 for All Symptoms in Patients with Baseline WURSS-44 Q1 Score of 4-7

| Questionnaire Item               | Symptom Days | Treatment  | N  | LS Mean | Std Error | 95% c.i. |       | Treatment Comparison |           |          |       |         |
|----------------------------------|--------------|------------|----|---------|-----------|----------|-------|----------------------|-----------|----------|-------|---------|
|                                  |              |            |    |         |           | Lower    | Upper | Difference           |           | 95% c.i. |       | P-Value |
|                                  |              |            |    |         |           |          |       | LS Mean              | Std Error | Lower    | Upper |         |
| 04: Cough interfering with sleep | 0-5          | Treatment  | 19 | 24.74   | 1.39      | 21.89    | 27.58 |                      |           |          |       |         |
|                                  |              | Control    | 14 | 23.36   | 1.62      | 20.04    | 26.67 |                      |           |          |       |         |
|                                  |              | Difference | 33 |         |           |          |       | 1.38                 | 2.14      | -2.99    | 5.75  | 0.524   |
|                                  | 5-10         | Treatment  | 6  | 22.83   | 3.26      | 15.80    | 29.87 |                      |           |          |       |         |
|                                  |              | Control    | 9  | 18.00   | 2.66      | 12.26    | 23.74 |                      |           |          |       |         |
|                                  |              | Difference | 15 |         |           |          |       | 4.83                 | 4.2       | -4.25    | 13.91 | 0.271   |
|                                  | 0-10         | Treatment  | 25 | 23.30   | 1.44      | 20.39    | 26.20 |                      |           |          |       |         |
|                                  |              | Control    | 23 | 20.85   | 1.41      | 18.01    | 23.69 |                      |           |          |       |         |
|                                  |              | Difference | 48 |         |           |          |       | 2.45                 | 1.95      | -1.49    | 6.38  | 0.217   |
| 05: Sore throat                  | 0-5          | Treatment  | 25 | 24.68   | 1.34      | 21.97    | 27.39 |                      |           |          |       |         |
|                                  |              | Control    | 15 | 22.93   | 1.73      | 19.44    | 26.43 |                      |           |          |       |         |
|                                  |              | Difference | 40 |         |           |          |       | 1.75                 | 2.18      | -2.68    | 6.17  | 0.429   |
|                                  | 5-10         | Treatment  | 6  | 26.67   | 3.07      | 20.19    | 33.14 |                      |           |          |       |         |
|                                  |              | Control    | 13 | 21.85   | 2.09      | 17.45    | 26.25 |                      |           |          |       |         |
|                                  |              | Difference | 19 |         |           |          |       | 4.82                 | 3.71      | -3.01    | 12.65 | 0.211   |
|                                  | 0-10         | Treatment  | 31 | 25.12   | 1.39      | 22.33    | 27.90 |                      |           |          |       |         |
|                                  |              | Control    | 28 | 22.43   | 1.31      | 19.81    | 25.06 |                      |           |          |       |         |
|                                  |              | Difference | 59 |         |           |          |       | 2.68                 | 1.89      | -1.1     | 6.46  | 0.161   |
| 06: Scratchy throat              | 0-5          | Treatment  | 19 | 25.58   | 1.28      | 22.98    | 28.17 |                      |           |          |       |         |
|                                  |              | Control    | 17 | 24.65   | 1.35      | 21.90    | 27.39 |                      |           |          |       |         |
|                                  |              | Difference | 36 |         |           |          |       | 0.93                 | 1.86      | -2.84    | 4.71  | 0.619   |
|                                  | 5-10         | Treatment  | 6  | 26.50   | 3.15      | 19.71    | 33.29 |                      |           |          |       |         |
|                                  |              | Control    | 9  | 20.33   | 2.57      | 14.79    | 25.88 |                      |           |          |       |         |
|                                  |              | Difference | 15 |         |           |          |       | 6.17                 | 4.06      | -2.6     | 14.94 | 0.153   |
|                                  | 0-10         | Treatment  | 25 | 25.27   | 1.35      | 22.55    | 28.00 |                      |           |          |       |         |
|                                  |              | Control    | 26 | 22.84   | 1.27      | 20.29    | 25.39 |                      |           |          |       |         |
|                                  |              | Difference | 51 |         |           |          |       | 2.43                 | 1.77      | -1.13    | 5.99  | 0.176   |

---

\*p<0.05 by one-way ANOVA within symptom day strata (0-5, 6-10) and ANOVA with factors treatment and strata for 0-10 days.  
17MAR22,T05\_mild

**Supplement 8**

**Full Table of Analysis of Variance for Days of Mild Symptoms  
Comparison of Days with WURSS-44 Scores of 0-3 for All Symptoms  
in Patients with Baseline WURSS-44 Q1 Score of 4-7**

| Questionnaire Item | Symptom Days | Treatment  | N   | LS Mean | Std Error | 95% c.i. |       | Treatment Comparison |           |          |       |         |  |
|--------------------|--------------|------------|-----|---------|-----------|----------|-------|----------------------|-----------|----------|-------|---------|--|
|                    |              |            |     |         |           | Lower    | Upper | Difference           |           | 95% c.i. |       | P-Value |  |
|                    |              |            |     |         |           |          |       | LS Mean              | Std Error | Lower    | Upper |         |  |
| 10: Sneezing       | 0-5          | Treatment  | 22  | 25.86   | 1.23      | 23.37    | 28.35 |                      |           |          |       |         |  |
|                    |              | Control    | 17  | 24.65   | 1.40      | 21.81    | 27.48 |                      |           |          |       |         |  |
|                    |              | Difference | 39  |         |           |          |       | 1.22                 | 1.86      | -2.56    | 4.99  | 0.518   |  |
|                    | 5-10         | Treatment  | 11  | 26.64   | 1.57      | 23.27    | 30.00 |                      |           |          |       |         |  |
|                    |              | Control    | 5   | 16.60   | 2.33      | 11.60    | 21.60 |                      |           |          |       |         |  |
|                    |              | Difference | 16  |         |           |          |       | 10.04                | 2.81      | 4.01     | 16.06 | 0.003*  |  |
|                    | 0-10         | Treatment  | 33  | 25.74   | 1.07      | 23.60    | 27.88 |                      |           |          |       |         |  |
|                    |              | Control    | 22  | 22.20   | 1.35      | 19.50    | 24.90 |                      |           |          |       |         |  |
|                    |              | Difference | 55  |         |           |          |       | 3.54                 | 1.63      | 0.27     | 6.82  | 0.035*  |  |
| 11: Headache       | 0-5          | Treatment  | 50  | 23.84   | 0.91      | 22.04    | 25.64 |                      |           |          |       |         |  |
|                    |              | Control    | 40  | 20.73   | 1.01      | 18.71    | 22.74 |                      |           |          |       |         |  |
|                    |              | Difference | 90  |         |           |          |       | 3.11                 | 1.36      | 0.41     | 5.82  | 0.024*  |  |
|                    | 5-10         | Treatment  | 17  | 19.94   | 1.75      | 16.39    | 23.50 |                      |           |          |       |         |  |
|                    |              | Control    | 21  | 19.57   | 1.58      | 16.37    | 22.77 |                      |           |          |       |         |  |
|                    |              | Difference | 38  |         |           |          |       | 0.37                 | 2.36      | -4.41    | 5.15  | 0.876   |  |
|                    | 0-10         | Treatment  | 67  | 22.24   | 0.87      | 20.51    | 23.97 |                      |           |          |       |         |  |
|                    |              | Control    | 61  | 19.94   | 0.88      | 18.21    | 21.68 |                      |           |          |       |         |  |
|                    |              | Difference | 128 |         |           |          |       | 2.30                 | 1.19      | -0.05    | 4.65  | 0.055   |  |
| 12: Body aches     | 0-5          | Treatment  | 46  | 23.83   | 1.11      | 21.62    | 26.03 |                      |           |          |       |         |  |
|                    |              | Control    | 39  | 21.33   | 1.20      | 18.94    | 23.73 |                      |           |          |       |         |  |
|                    |              | Difference | 85  |         |           |          |       | 2.49                 | 1.64      | -0.76    | 5.75  | 0.131   |  |
|                    | 5-10         | Treatment  | 14  | 24.93   | 2.12      | 20.61    | 29.25 |                      |           |          |       |         |  |
|                    |              | Control    | 20  | 18.95   | 1.77      | 15.34    | 22.56 |                      |           |          |       |         |  |
|                    |              | Difference | 34  |         |           |          |       | 5.98                 | 2.76      | 0.35     | 11.61 | 0.038*  |  |
|                    | 0-10         | Treatment  | 60  | 23.86   | 1.07      | 21.74    | 25.98 |                      |           |          |       |         |  |
|                    |              | Control    | 59  | 20.39   | 1.03      | 18.36    | 22.43 |                      |           |          |       |         |  |
|                    |              | Difference | 119 |         |           |          |       | 3.47                 | 1.41      | 0.68     | 6.26  | 0.015*  |  |

---

\*p<0.05 by one-way ANOVA within symptom day strata (0-5, 6-10) and ANOVA with factors treatment and strata for 0-10 days.  
17MAR22,T05\_mild

**Supplement 8**

**Full Table of Analysis of Variance for Days of Mild Symptoms  
Comparison of Days with WURSS-44 Scores of 0-3 for All Symptoms  
in Patients with Baseline WURSS-44 Q1 Score of 4-7**

| Questionnaire Item   | Symptom Days | Treatment  | N   | LS Mean | Std Error | 95% c.i. |       | Treatment Comparison |           |          |       |         |  |
|----------------------|--------------|------------|-----|---------|-----------|----------|-------|----------------------|-----------|----------|-------|---------|--|
|                      |              |            |     |         |           | Lower    | Upper | Difference           |           | 95% c.i. |       | P-Value |  |
|                      |              |            |     |         |           |          |       | LS Mean              | Std Error | Lower    | Upper |         |  |
| 13: Feeling run down | 0-5          | Treatment  | 61  | 21.41   | 1.08      | 19.27    | 23.55 |                      |           |          |       |         |  |
|                      |              | Control    | 61  | 19.56   | 1.08      | 17.42    | 21.70 |                      |           |          |       |         |  |
|                      |              | Difference | 122 |         |           |          |       | 1.85                 | 1.53      | -1.17    | 4.88  | 0.228   |  |
|                      | 5-10         | Treatment  | 26  | 19.00   | 1.89      | 15.21    | 22.79 |                      |           |          |       |         |  |
|                      |              | Control    | 28  | 18.54   | 1.82      | 14.89    | 22.19 |                      |           |          |       |         |  |
|                      |              | Difference | 54  |         |           |          |       | 0.46                 | 2.62      | -4.80    | 5.73  | 0.860   |  |
|                      | 0-10         | Treatment  | 87  | 20.35   | 0.99      | 18.40    | 22.29 |                      |           |          |       |         |  |
|                      |              | Control    | 89  | 18.92   | 0.97      | 17.01    | 20.83 |                      |           |          |       |         |  |
|                      |              | Difference | 176 |         |           |          |       | 1.43                 | 1.33      | -1.19    | 4.04  | 0.283   |  |
| 14: Sweats           | 0-5          | Treatment  | 31  | 24.32   | 0.95      | 22.42    | 26.23 |                      |           |          |       |         |  |
|                      |              | Control    | 26  | 25.92   | 1.04      | 23.85    | 28.00 |                      |           |          |       |         |  |
|                      |              | Difference | 57  |         |           |          |       | -1.60                | 1.41      | -4.42    | 1.22  | 0.260   |  |
|                      | 5-10         | Treatment  | 10  | 23.10   | 2.29      | 18.31    | 27.89 |                      |           |          |       |         |  |
|                      |              | Control    | 11  | 24.18   | 2.18      | 19.61    | 28.75 |                      |           |          |       |         |  |
|                      |              | Difference | 21  |         |           |          |       | -1.08                | 3.16      | -7.70    | 5.54  | 0.736   |  |
|                      | 0-10         | Treatment  | 41  | 23.64   | 0.98      | 21.68    | 25.61 |                      |           |          |       |         |  |
|                      |              | Control    | 37  | 25.10   | 1.00      | 23.11    | 27.10 |                      |           |          |       |         |  |
|                      |              | Difference | 78  |         |           |          |       | -1.46                | 1.32      | -4.09    | 1.17  | 0.272   |  |
| 15: Chills           | 0-5          | Treatment  | 28  | 24.46   | 1.21      | 22.03    | 26.90 |                      |           |          |       |         |  |
|                      |              | Control    | 16  | 24.69   | 1.60      | 21.47    | 27.91 |                      |           |          |       |         |  |
|                      |              | Difference | 44  |         |           |          |       | -0.22                | 2.00      | -4.26    | 3.82  | 0.912   |  |
|                      | 5-10         | Treatment  | 8   | 22.25   | 3.37      | 15.07    | 29.43 |                      |           |          |       |         |  |
|                      |              | Control    | 9   | 21.11   | 3.18      | 14.34    | 27.88 |                      |           |          |       |         |  |
|                      |              | Difference | 17  |         |           |          |       | 1.14                 | 4.63      | -8.73    | 11.01 | 0.809   |  |
|                      | 0-10         | Treatment  | 36  | 23.18   | 1.35      | 20.48    | 25.87 |                      |           |          |       |         |  |
|                      |              | Control    | 25  | 23.00   | 1.49      | 20.02    | 25.97 |                      |           |          |       |         |  |
|                      |              | Difference | 61  |         |           |          |       | 0.18                 | 1.92      | -3.66    | 4.02  | 0.927   |  |

---

\*p<0.05 by one-way ANOVA within symptom day strata (0-5, 6-10) and ANOVA with factors treatment and strata for 0-10 days.  
17MAR22,T05\_mild

**Supplement 8**

**Full Table of Analysis of Variance for Days of Mild Symptoms  
Comparison of Days with WURSS-44 Scores of 0-3 for All Symptoms  
in Patients with Baseline WURSS-44 Q1 Score of 4-7**

| Questionnaire Item   | Symptom Days | Treatment  | N   | LS Mean | Std Error | 95% c.i. |       | Treatment Comparison |           |          |       |         |  |
|----------------------|--------------|------------|-----|---------|-----------|----------|-------|----------------------|-----------|----------|-------|---------|--|
|                      |              |            |     |         |           | Lower    | Upper | Difference           |           | 95% c.i. |       | P-Value |  |
|                      |              |            |     |         |           |          |       | LS Mean              | Std Error | Lower    | Upper |         |  |
| 16: Feeling feverish | 0-5          | Treatment  | 26  | 24.08   | 1.19      | 21.67    | 26.49 |                      |           |          |       |         |  |
|                      |              | Control    | 18  | 24.72   | 1.44      | 21.83    | 27.62 |                      |           |          |       |         |  |
|                      |              | Difference | 44  |         |           |          |       | -0.65                | 1.87      | -4.41    | 3.12  | 0.731   |  |
|                      | 5-10         | Treatment  | 8   | 22.25   | 3.36      | 15.08    | 29.42 |                      |           |          |       |         |  |
|                      |              | Control    | 9   | 20.67   | 3.17      | 13.91    | 27.43 |                      |           |          |       |         |  |
|                      |              | Difference | 17  |         |           |          |       | 1.58                 | 4.62      | -8.27    | 11.44 | 0.737   |  |
|                      | 0-10         | Treatment  | 34  | 22.87   | 1.33      | 20.20    | 25.54 |                      |           |          |       |         |  |
|                      |              | Control    | 27  | 22.88   | 1.41      | 20.06    | 25.70 |                      |           |          |       |         |  |
|                      |              | Difference | 61  |         |           |          |       | -0.01                | 1.84      | -3.70    | 3.68  | 0.995   |  |
| 17: Feeling dizzy    | 0-5          | Treatment  | 27  | 23.30   | 1.33      | 20.63    | 25.96 |                      |           |          |       |         |  |
|                      |              | Control    | 32  | 23.19   | 1.22      | 20.74    | 25.63 |                      |           |          |       |         |  |
|                      |              | Difference | 59  |         |           |          |       | 0.11                 | 1.81      | -3.51    | 3.72  | 0.952   |  |
|                      | 5-10         | Treatment  | 13  | 22.31   | 2.57      | 16.99    | 27.62 |                      |           |          |       |         |  |
|                      |              | Control    | 12  | 19.83   | 2.67      | 14.30    | 25.37 |                      |           |          |       |         |  |
|                      |              | Difference | 25  |         |           |          |       | 2.47                 | 3.71      | -5.20    | 10.15 | 0.511   |  |
|                      | 0-10         | Treatment  | 40  | 22.60   | 1.25      | 20.11    | 25.08 |                      |           |          |       |         |  |
|                      |              | Control    | 44  | 21.78   | 1.22      | 19.35    | 24.21 |                      |           |          |       |         |  |
|                      |              | Difference | 84  |         |           |          |       | 0.82                 | 1.67      | -2.51    | 4.14  | 0.627   |  |
| 18: Feeling tired    | 0-5          | Treatment  | 62  | 20.89   | 1.06      | 18.79    | 22.98 |                      |           |          |       |         |  |
|                      |              | Control    | 63  | 19.11   | 1.05      | 17.03    | 21.19 |                      |           |          |       |         |  |
|                      |              | Difference | 125 |         |           |          |       | 1.78                 | 1.49      | -1.18    | 4.73  | 0.236   |  |
|                      | 5-10         | Treatment  | 25  | 17.44   | 1.99      | 13.45    | 21.43 |                      |           |          |       |         |  |
|                      |              | Control    | 29  | 17.90   | 1.84      | 14.19    | 21.60 |                      |           |          |       |         |  |
|                      |              | Difference | 54  |         |           |          |       | -0.46                | 2.71      | -5.90    | 4.98  | 0.867   |  |
|                      | 0-10         | Treatment  | 87  | 19.41   | 1.00      | 17.45    | 21.38 |                      |           |          |       |         |  |
|                      |              | Control    | 92  | 18.31   | 0.96      | 16.42    | 20.20 |                      |           |          |       |         |  |
|                      |              | Difference | 179 |         |           |          |       | 1.11                 | 1.32      | -1.50    | 3.71  | 0.404   |  |

---

\*p<0.05 by one-way ANOVA within symptom day strata (0-5, 6-10) and ANOVA with factors treatment and strata for 0-10 days.  
17MAR22,T05\_mild

**Supplement 8**

**Full Table of Analysis of Variance for Days of Mild Symptoms  
Comparison of Days with WURSS-44 Scores of 0-3 for All Symptoms  
in Patients with Baseline WURSS-44 Q1 Score of 4-7**

| Questionnaire Item | Symptom Days | Treatment  | N  | LS Mean | Std Error | 95% c.i. |       | Treatment Comparison |           |          |       | P-Value |  |
|--------------------|--------------|------------|----|---------|-----------|----------|-------|----------------------|-----------|----------|-------|---------|--|
|                    |              |            |    |         |           | Lower    | Upper | Difference           |           | 95% c.i. |       |         |  |
|                    |              |            |    |         |           |          |       | LS Mean              | Std Error | Lower    | Upper |         |  |
| 19: Irritability   | 0-5          | Treatment  | 33 | 23.06   | 1.33      | 20.41    | 25.71 |                      |           |          |       |         |  |
|                    |              | Control    | 35 | 19.49   | 1.29      | 16.92    | 22.06 |                      |           |          |       |         |  |
|                    |              | Difference | 68 |         |           |          |       | 3.57                 | 1.85      | -0.11    | 7.26  | 0.057   |  |
|                    | 5-10         | Treatment  | 16 | 21.19   | 2.22      | 16.62    | 25.75 |                      |           |          |       |         |  |
|                    |              | Control    | 13 | 16.85   | 2.47      | 11.78    | 21.91 |                      |           |          |       |         |  |
|                    |              | Difference | 29 |         |           |          |       | 4.34                 | 3.32      | -2.47    | 11.16 | 0.202   |  |
|                    | 0-10         | Treatment  | 49 | 22.06   | 1.18      | 19.72    | 24.40 |                      |           |          |       |         |  |
|                    |              | Control    | 48 | 18.26   | 1.22      | 15.84    | 20.68 |                      |           |          |       |         |  |
|                    |              | Difference | 97 |         |           |          |       | 3.80                 | 1.62      | 0.58     | 7.02  | 0.021*  |  |
| 20: Sinus pain     | 0-5          | Treatment  | 28 | 23.86   | 1.33      | 21.20    | 26.52 |                      |           |          |       |         |  |
|                    |              | Control    | 32 | 22.84   | 1.24      | 20.35    | 25.33 |                      |           |          |       |         |  |
|                    |              | Difference | 60 |         |           |          |       | 1.01                 | 1.82      | -2.63    | 4.66  | 0.580   |  |
|                    | 5-10         | Treatment  | 11 | 24.82   | 2.38      | 19.84    | 29.79 |                      |           |          |       |         |  |
|                    |              | Control    | 10 | 19.50   | 2.49      | 14.28    | 24.72 |                      |           |          |       |         |  |
|                    |              | Difference | 21 |         |           |          |       | 5.32                 | 3.44      | -1.89    | 12.53 | 0.139   |  |
|                    | 0-10         | Treatment  | 39 | 23.88   | 1.23      | 21.42    | 26.33 |                      |           |          |       |         |  |
|                    |              | Control    | 42 | 21.75   | 1.22      | 19.31    | 24.18 |                      |           |          |       |         |  |
|                    |              | Difference | 81 |         |           |          |       | 2.13                 | 1.62      | -1.09    | 5.35  | 0.192   |  |
| 21: Sinus pressure | 0-5          | Treatment  | 28 | 23.71   | 1.35      | 21.02    | 26.41 |                      |           |          |       |         |  |
|                    |              | Control    | 37 | 23.19   | 1.17      | 20.85    | 25.53 |                      |           |          |       |         |  |
|                    |              | Difference | 65 |         |           |          |       | 0.53                 | 1.79      | -3.04    | 4.09  | 0.770   |  |
|                    | 5-10         | Treatment  | 13 | 23.77   | 2.35      | 18.94    | 28.60 |                      |           |          |       |         |  |
|                    |              | Control    | 15 | 21.13   | 2.19      | 16.64    | 25.63 |                      |           |          |       |         |  |
|                    |              | Difference | 28 |         |           |          |       | 2.64                 | 3.21      | -3.96    | 9.23  | 0.419   |  |
|                    | 0-10         | Treatment  | 41 | 23.53   | 1.21      | 21.12    | 25.94 |                      |           |          |       |         |  |
|                    |              | Control    | 52 | 22.36   | 1.10      | 20.17    | 24.56 |                      |           |          |       |         |  |
|                    |              | Difference | 93 |         |           |          |       | 1.17                 | 1.57      | -1.95    | 4.29  | 0.460   |  |

---

\*p<0.05 by one-way ANOVA within symptom day strata (0-5, 6-10) and ANOVA with factors treatment and strata for 0-10 days.

17MAR22,T05\_mild

## Supplement 8

### Full Table of Analysis of Variance for Days of Mild Symptoms Comparison of Days with WURSS-44 Scores of 0-3 for All Symptoms in Patients with Baseline WURSS-44 Q1 Score of 4-7

| Questionnaire Item | Symptom Days | Treatment  | N  | LS Mean | Std Error | 95% c.i. |       | Treatment Comparison |           |          |       |         |  |
|--------------------|--------------|------------|----|---------|-----------|----------|-------|----------------------|-----------|----------|-------|---------|--|
|                    |              |            |    |         |           | Lower    | Upper | Difference           |           | 95% c.i. |       | P-Value |  |
|                    |              |            |    |         |           |          |       | LS Mean              | Std Error | Lower    | Upper |         |  |
| 22: Sinus drainage | 0-5          | Treatment  | 19 | 21.58   | 1.79      | 17.95    | 25.2  |                      |           |          |       |         |  |
|                    |              | Control    | 21 | 22.81   | 1.7       | 19.36    | 26.26 |                      |           |          |       |         |  |
|                    |              | Difference | 40 |         |           |          |       | -1.23                | 2.47      | -6.23    | 3.77  | 0.621   |  |
|                    | 5-10         | Treatment  | 9  | 26.44   | 2.42      | 21.21    | 31.68 |                      |           |          |       |         |  |
|                    |              | Control    | 6  | 16.50   | 2.97      | 10.09    | 22.91 |                      |           |          |       |         |  |
|                    |              | Difference | 15 |         |           |          |       | 9.94                 | 3.83      | 1.66     | 18.23 | 0.022*  |  |
|                    | 0-10         | Treatment  | 28 | 23.15   | 1.57      | 19.99    | 26.31 |                      |           |          |       |         |  |
|                    |              | Control    | 27 | 21.41   | 1.68      | 18.04    | 24.79 |                      |           |          |       |         |  |
|                    |              | Difference | 55 |         |           |          |       | 1.73                 | 2.17      | -2.63    | 6.09  | 0.429   |  |
| 23: Swollen glands | 0-5          | Treatment  | 20 | 25.05   | 1.28      | 22.45    | 27.65 |                      |           |          |       |         |  |
|                    |              | Control    | 13 | 25.00   | 1.58      | 21.77    | 28.23 |                      |           |          |       |         |  |
|                    |              | Difference | 33 |         |           |          |       | 0.05                 | 2.03      | -4.10    | 4.20  | 0.981   |  |
|                    | 5-10         | Treatment  | 3  | 20.67   | 4.92      | 9.32     | 32.02 |                      |           |          |       |         |  |
|                    |              | Control    | 7  | 19.14   | 3.22      | 11.71    | 26.57 |                      |           |          |       |         |  |
|                    |              | Difference | 10 |         |           |          |       | 1.52                 | 5.88      | -12.04   | 15.09 | 0.802   |  |
|                    | 0-10         | Treatment  | 23 | 22.51   | 1.58      | 19.32    | 25.7  |                      |           |          |       |         |  |
|                    |              | Control    | 20 | 22.15   | 1.46      | 19.21    | 25.09 |                      |           |          |       |         |  |
|                    |              | Difference | 43 |         |           |          |       | 0.36                 | 2.00      | -3.68    | 4.40  | 0.858   |  |
| 24: Plugged ears   | 0-5          | Treatment  | 12 | 23.92   | 1.75      | 20.33    | 27.5  |                      |           |          |       |         |  |
|                    |              | Control    | 17 | 22.53   | 1.47      | 19.52    | 25.54 |                      |           |          |       |         |  |
|                    |              | Difference | 29 |         |           |          |       | 1.39                 | 2.28      | -3.30    | 6.07  | 0.548   |  |
|                    | 5-10         | Treatment  | 8  | 26.00   | 2.26      | 21.02    | 30.98 |                      |           |          |       |         |  |
|                    |              | Control    | 5  | 17.80   | 2.86      | 11.5     | 24.1  |                      |           |          |       |         |  |
|                    |              | Difference | 13 |         |           |          |       | 8.20                 | 3.65      | 0.17     | 16.23 | 0.046*  |  |
|                    | 0-10         | Treatment  | 20 | 24.65   | 1.42      | 21.78    | 27.53 |                      |           |          |       |         |  |
|                    |              | Control    | 22 | 21.19   | 1.46      | 18.24    | 24.15 |                      |           |          |       |         |  |
|                    |              | Difference | 42 |         |           |          |       | 3.46                 | 1.98      | -0.54    | 7.46  | 0.088   |  |

---

\*p<0.05 by one-way ANOVA within symptom day strata (0-5, 6-10) and ANOVA with factors treatment and strata for 0-10 days.

17MAR22,T05\_mild

**Supplement 8**

**Full Table of Analysis of Variance for Days of Mild Symptoms  
Comparison of Days with WURSS-44 Scores of 0-3 for All Symptoms  
in Patients with Baseline WURSS-44 Q1 Score of 4-7**

| Questionnaire Item | Symptom Days | Treatment  | N  | LS Mean | Std Error | 95% c.i. |       | Treatment Comparison |           |          |       |         |  |
|--------------------|--------------|------------|----|---------|-----------|----------|-------|----------------------|-----------|----------|-------|---------|--|
|                    |              |            |    |         |           | Lower    | Upper | Difference           |           | 95% c.i. |       | P-Value |  |
|                    |              |            |    |         |           |          |       | LS Mean              | Std Error | Lower    | Upper |         |  |
| 25: Ear discomfort | 0-5          | Treatment  | 14 | 25.50   | 1.40      | 22.63    | 28.37 |                      |           |          |       |         |  |
|                    |              | Control    | 14 | 21.79   | 1.40      | 18.91    | 24.66 |                      |           |          |       |         |  |
|                    |              | Difference | 28 |         |           |          |       | 3.71                 | 1.98      | -0.35    | 7.78  | 0.072   |  |
|                    | 5-10         | Treatment  | 10 | 25.30   | 2.04      | 20.95    | 29.65 |                      |           |          |       |         |  |
|                    |              | Control    | 7  | 21.71   | 2.44      | 16.51    | 26.92 |                      |           |          |       |         |  |
|                    |              | Difference | 17 |         |           |          |       | 3.59                 | 3.18      | -3.20    | 10.37 | 0.278   |  |
|                    | 0-10         | Treatment  | 24 | 25.40   | 1.16      | 23.06    | 27.75 |                      |           |          |       |         |  |
|                    |              | Control    | 21 | 21.74   | 1.27      | 19.18    | 24.29 |                      |           |          |       |         |  |
|                    |              | Difference | 45 |         |           |          |       | 3.67                 | 1.69      | 0.25     | 7.08  | 0.036*  |  |
| 26: Watery eyes    | 0-5          | Treatment  | 7  | 21.71   | 3.51      | 13.89    | 29.54 |                      |           |          |       |         |  |
|                    |              | Control    | 5  | 19.40   | 4.15      | 10.15    | 28.65 |                      |           |          |       |         |  |
|                    |              | Difference | 12 |         |           |          |       | 2.31                 | 5.44      | -9.80    | 14.43 | 0.679   |  |
|                    | 5-10         | Treatment  | 8  | 25.25   | 2.17      | 20.42    | 30.08 |                      |           |          |       |         |  |
|                    |              | Control    | 4  | 18.25   | 3.07      | 11.42    | 25.08 |                      |           |          |       |         |  |
|                    |              | Difference | 12 |         |           |          |       | 7.00                 | 3.76      | -1.37    | 15.37 | 0.092   |  |
|                    | 0-10         | Treatment  | 15 | 23.54   | 2.01      | 19.36    | 27.72 |                      |           |          |       |         |  |
|                    |              | Control    | 9  | 18.99   | 2.60      | 13.59    | 24.39 |                      |           |          |       |         |  |
|                    |              | Difference | 24 |         |           |          |       | 4.55                 | 3.29      | -2.29    | 11.40 | 0.181   |  |
| 27: Eye discomfort | 0-5          | Treatment  | 10 | 25.50   | 1.85      | 21.66    | 29.34 |                      |           |          |       |         |  |
|                    |              | Control    | 13 | 24.00   | 1.62      | 20.63    | 27.37 |                      |           |          |       |         |  |
|                    |              | Difference | 23 |         |           |          |       | 1.50                 | 2.46      | -3.61    | 6.61  | 0.548   |  |
|                    | 5-10         | Treatment  | 7  | 23.86   | 2.78      | 17.65    | 30.06 |                      |           |          |       |         |  |
|                    |              | Control    | 5  | 21.00   | 3.30      | 13.66    | 28.34 |                      |           |          |       |         |  |
|                    |              | Difference | 12 |         |           |          |       | 2.86                 | 4.31      | -6.76    | 12.47 | 0.523   |  |
|                    | 0-10         | Treatment  | 17 | 24.62   | 1.54      | 21.49    | 27.75 |                      |           |          |       |         |  |
|                    |              | Control    | 18 | 22.66   | 1.56      | 19.48    | 25.85 |                      |           |          |       |         |  |
|                    |              | Difference | 35 |         |           |          |       | 1.96                 | 2.15      | -2.41    | 6.33  | 0.367   |  |

---

\*p<0.05 by one-way ANOVA within symptom day strata (0-5, 6-10) and ANOVA with factors treatment and strata for 0-10 days.

17MAR22,T05\_mild

## Supplement 8

### Full Table of Analysis of Variance for Days of Mild Symptoms Comparison of Days with WURSS-44 Scores of 0-3 for All Symptoms in Patients with Baseline WURSS-44 Q1 Score of 4-7

| Questionnaire Item   | Symptom Days | Treatment  | N   | LS Mean | Std Error | 95% c.i. |       | Treatment Comparison |           |          |       |         |  |
|----------------------|--------------|------------|-----|---------|-----------|----------|-------|----------------------|-----------|----------|-------|---------|--|
|                      |              |            |     |         |           | Lower    | Upper | Difference           |           | 95% c.i. |       | P-Value |  |
|                      |              |            |     |         |           |          |       | LS Mean              | Std Error | Lower    | Upper |         |  |
| 28: Head congestion  | 0-5          | Treatment  | 32  | 22.59   | 1.25      | 20.11    | 25.08 |                      |           |          |       |         |  |
|                      |              | Control    | 39  | 23.18   | 1.13      | 20.93    | 25.43 |                      |           |          |       |         |  |
|                      |              | Difference | 71  |         |           |          |       | -0.59                | 1.68      | -3.94    | 2.77  | 0.729   |  |
|                      | 5-10         | Treatment  | 13  | 23.92   | 2.12      | 19.57    | 28.27 |                      |           |          |       |         |  |
|                      |              | Control    | 17  | 22.35   | 1.86      | 18.55    | 26.16 |                      |           |          |       |         |  |
|                      |              | Difference | 30  |         |           |          |       | 1.57                 | 2.82      | -4.21    | 7.35  | 0.582   |  |
|                      | 0-10         | Treatment  | 45  | 23.00   | 1.13      | 20.77    | 25.24 |                      |           |          |       |         |  |
|                      |              | Control    | 56  | 22.95   | 1.01      | 20.94    | 24.96 |                      |           |          |       |         |  |
|                      |              | Difference | 101 |         |           |          |       | 0.05                 | 1.44      | -2.82    | 2.92  | 0.972   |  |
| 29: Chest congestion | 0-5          | Treatment  | 32  | 23.69   | 1.26      | 21.16    | 26.21 |                      |           |          |       |         |  |
|                      |              | Control    | 27  | 22.26   | 1.37      | 19.51    | 25.01 |                      |           |          |       |         |  |
|                      |              | Difference | 59  |         |           |          |       | 1.43                 | 1.86      | -2.30    | 5.16  | 0.447   |  |
|                      | 5-10         | Treatment  | 11  | 25.82   | 1.25      | 23.18    | 28.45 |                      |           |          |       |         |  |
|                      |              | Control    | 8   | 22.63   | 1.46      | 19.54    | 25.71 |                      |           |          |       |         |  |
|                      |              | Difference | 19  |         |           |          |       | 3.19                 | 1.92      | -0.87    | 7.25  | 0.115   |  |
|                      | 0-10         | Treatment  | 43  | 24.57   | 1.08      | 22.41    | 26.72 |                      |           |          |       |         |  |
|                      |              | Control    | 35  | 22.72   | 1.20      | 20.33    | 25.10 |                      |           |          |       |         |  |
|                      |              | Difference | 78  |         |           |          |       | 1.85                 | 1.49      | -1.11    | 4.82  | 0.217   |  |
| 30: Chest tightness  | 0-5          | Treatment  | 25  | 21.84   | 1.56      | 18.70    | 24.98 |                      |           |          |       |         |  |
|                      |              | Control    | 21  | 21.19   | 1.70      | 17.76    | 24.62 |                      |           |          |       |         |  |
|                      |              | Difference | 46  |         |           |          |       | 0.65                 | 2.31      | -4.01    | 5.30  | 0.780   |  |
|                      | 5-10         | Treatment  | 16  | 25.06   | 1.21      | 22.56    | 27.56 |                      |           |          |       |         |  |
|                      |              | Control    | 11  | 23.73   | 1.46      | 20.71    | 26.74 |                      |           |          |       |         |  |
|                      |              | Difference | 27  |         |           |          |       | 1.34                 | 1.90      | -2.58    | 5.25  | 0.489   |  |
|                      | 0-10         | Treatment  | 41  | 23.42   | 1.08      | 21.26    | 25.58 |                      |           |          |       |         |  |
|                      |              | Control    | 32  | 22.52   | 1.24      | 20.06    | 24.98 |                      |           |          |       |         |  |
|                      |              | Difference | 73  |         |           |          |       | 0.90                 | 1.61      | -2.32    | 4.12  | 0.579   |  |

---

\*p<0.05 by one-way ANOVA within symptom day strata (0-5, 6-10) and ANOVA with factors treatment and strata for 0-10 days.

17MAR22,T05\_mild

## Supplement 8

### Full Table of Analysis of Variance for Days of Mild Symptoms Comparison of Days with WURSS-44 Scores of 0-3 for All Symptoms in Patients with Baseline WURSS-44 Q1 Score of 4-7

| Questionnaire Item     | Symptom Days | Treatment  | N   | LS Mean | Std Error | 95% c.i. |       | Treatment Comparison |           |          |       | P-Value |  |
|------------------------|--------------|------------|-----|---------|-----------|----------|-------|----------------------|-----------|----------|-------|---------|--|
|                        |              |            |     |         |           | Lower    | Upper | Difference           |           | 95% c.i. |       |         |  |
|                        |              |            |     |         |           |          |       | LS Mean              | Std Error | Lower    | Upper |         |  |
| 31: Heaviness in chest | 0-5          | Treatment  | 24  | 21.42   | 1.62      | 18.16    | 24.67 |                      |           |          |       |         |  |
|                        |              | Control    | 22  | 21.09   | 1.69      | 17.69    | 24.49 |                      |           |          |       |         |  |
|                        |              | Difference | 46  |         |           |          |       | 0.33                 | 2.34      | -4.39    | 5.04  | 0.890   |  |
|                        | 5-10         | Treatment  | 14  | 24.64   | 1.35      | 21.84    | 27.45 |                      |           |          |       |         |  |
|                        |              | Control    | 10  | 23.9    | 1.6       | 20.58    | 27.22 |                      |           |          |       |         |  |
|                        |              | Difference | 24  |         |           |          |       | 0.74                 | 2.10      | -3.61    | 5.09  | 0.726   |  |
|                        | 0-10         | Treatment  | 38  | 23.01   | 1.17      | 20.68    | 25.33 |                      |           |          |       |         |  |
|                        |              | Control    | 32  | 22.54   | 1.29      | 19.97    | 25.11 |                      |           |          |       |         |  |
|                        |              | Difference | 70  |         |           |          |       | 0.47                 | 1.69      | -2.91    | 3.85  | 0.784   |  |
| 32: Lack of energy     | 0-5          | Treatment  | 59  | 20.49   | 1.11      | 18.29    | 22.69 |                      |           |          |       |         |  |
|                        |              | Control    | 59  | 19.59   | 1.11      | 17.39    | 21.79 |                      |           |          |       |         |  |
|                        |              | Difference | 118 |         |           |          |       | 0.90                 | 1.57      | -2.22    | 4.01  | 0.569   |  |
|                        | 5-10         | Treatment  | 25  | 17.6    | 1.96      | 13.67    | 21.53 |                      |           |          |       |         |  |
|                        |              | Control    | 27  | 17.44   | 1.88      | 13.66    | 21.23 |                      |           |          |       |         |  |
|                        |              | Difference | 52  |         |           |          |       | 0.16                 | 2.72      | -5.30    | 5.61  | 0.955   |  |
|                        | 0-10         | Treatment  | 84  | 19.12   | 1.02      | 17.12    | 21.13 |                      |           |          |       |         |  |
|                        |              | Control    | 86  | 18.45   | 1         | 16.48    | 20.42 |                      |           |          |       |         |  |
|                        |              | Difference | 170 |         |           |          |       | 0.67                 | 1.37      | -2.03    | 3.37  | 0.624   |  |
| 33: Loss of appetite   | 0-5          | Treatment  | 36  | 22.97   | 1.14      | 20.7     | 25.24 |                      |           |          |       |         |  |
|                        |              | Control    | 38  | 22.63   | 1.11      | 20.42    | 24.84 |                      |           |          |       |         |  |
|                        |              | Difference | 74  |         |           |          |       | 0.34                 | 1.59      | -2.83    | 3.51  | 0.831   |  |
|                        | 5-10         | Treatment  | 15  | 24.67   | 2.16      | 20.25    | 29.09 |                      |           |          |       |         |  |
|                        |              | Control    | 15  | 20.6    | 2.16      | 16.18    | 25.02 |                      |           |          |       |         |  |
|                        |              | Difference | 30  |         |           |          |       | 4.07                 | 3.05      | -2.18    | 10.32 | 0.193   |  |
|                        | 0-10         | Treatment  | 51  | 23.43   | 1.07      | 21.3     | 25.56 |                      |           |          |       |         |  |
|                        |              | Control    | 53  | 22.02   | 1.06      | 19.91    | 24.12 |                      |           |          |       |         |  |
|                        |              | Difference | 104 |         |           |          |       | 1.42                 | 1.43      | -1.43    | 4.26  | 0.326   |  |

---

\*p<0.05 by one-way ANOVA within symptom day strata (0-5, 6-10) and ANOVA with factors treatment and strata for 0-10 days.

17MAR22,T05\_mild

**Supplement 8**

**Full Table of Analysis of Variance for Days of Mild Symptoms  
Comparison of Days with WURSS-44 Scores of 0-3 for All Symptoms  
in Patients with Baseline WURSS-44 Q1 Score of 4-7**

| Questionnaire Item | Symptom Days | Treatment  | N   | LS Mean | Std Error | 95% c.i. |       | Treatment Comparison |           |          |       |         |  |
|--------------------|--------------|------------|-----|---------|-----------|----------|-------|----------------------|-----------|----------|-------|---------|--|
|                    |              |            |     |         |           | Lower    | Upper | Difference           |           | 95% c.i. |       | P-Value |  |
|                    |              |            |     |         |           |          |       | LS Mean              | Std Error | Lower    | Upper |         |  |
| 34: Think clearly  | 0-5          | Treatment  | 29  | 21.62   | 1.53      | 18.56    | 24.68 |                      |           |          |       |         |  |
|                    |              | Control    | 30  | 22.70   | 1.50      | 19.69    | 25.71 |                      |           |          |       |         |  |
|                    |              | Difference | 59  |         |           |          |       | -1.08                | 2.14      | -5.37    | 3.21  | 0.616   |  |
|                    | 5-10         | Treatment  | 15  | 22.20   | 2.31      | 17.43    | 26.97 |                      |           |          |       |         |  |
|                    |              | Control    | 11  | 15.45   | 2.70      | 9.88     | 21.03 |                      |           |          |       |         |  |
|                    |              | Difference | 26  |         |           |          |       | 6.75                 | 3.56      | -0.59    | 14.08 | 0.070   |  |
|                    | 0-10         | Treatment  | 44  | 21.35   | 1.34      | 18.70    | 24.01 |                      |           |          |       |         |  |
|                    |              | Control    | 41  | 20.08   | 1.42      | 17.25    | 22.91 |                      |           |          |       |         |  |
|                    |              | Difference | 85  |         |           |          |       | 1.28                 | 1.87      | -2.45    | 5.00  | 0.498   |  |
| 35: Speak clearly  | 0-5          | Treatment  | 15  | 18.07   | 2.34      | 13.28    | 22.85 |                      |           |          |       |         |  |
|                    |              | Control    | 16  | 22.87   | 2.26      | 18.24    | 27.51 |                      |           |          |       |         |  |
|                    |              | Difference | 31  |         |           |          |       | -4.81                | 3.25      | -11.47   | 1.85  | 0.150   |  |
|                    | 5-10         | Treatment  | 9   | 25.44   | 2.67      | 19.71    | 31.18 |                      |           |          |       |         |  |
|                    |              | Control    | 7   | 17.57   | 3.03      | 11.07    | 24.07 |                      |           |          |       |         |  |
|                    |              | Difference | 16  |         |           |          |       | 7.87                 | 4.04      | -0.79    | 16.54 | 0.072   |  |
|                    | 0-10         | Treatment  | 24  | 21.02   | 1.90      | 17.18    | 24.86 |                      |           |          |       |         |  |
|                    |              | Control    | 23  | 21.55   | 1.99      | 17.54    | 25.56 |                      |           |          |       |         |  |
|                    |              | Difference | 47  |         |           |          |       | -0.53                | 2.68      | -5.94    | 4.87  | 0.843   |  |
| 36: Sleep well     | 0-5          | Treatment  | 39  | 22.59   | 1.16      | 20.28    | 24.90 |                      |           |          |       |         |  |
|                    |              | Control    | 36  | 21.22   | 1.21      | 18.82    | 23.63 |                      |           |          |       |         |  |
|                    |              | Difference | 75  |         |           |          |       | 1.37                 | 1.67      | -1.97    | 4.71  | 0.417   |  |
|                    | 5-10         | Treatment  | 16  | 20.19   | 2.30      | 15.49    | 24.88 |                      |           |          |       |         |  |
|                    |              | Control    | 17  | 15.88   | 2.23      | 11.33    | 20.44 |                      |           |          |       |         |  |
|                    |              | Difference | 33  |         |           |          |       | 4.31                 | 3.21      | -2.24    | 10.85 | 0.189   |  |
|                    | 0-10         | Treatment  | 55  | 21.08   | 1.12      | 18.87    | 23.29 |                      |           |          |       |         |  |
|                    |              | Control    | 53  | 18.81   | 1.12      | 16.59    | 21.04 |                      |           |          |       |         |  |
|                    |              | Difference | 108 |         |           |          |       | 2.27                 | 1.52      | -0.74    | 5.27  | 0.138   |  |

---

\*p<0.05 by one-way ANOVA within symptom day strata (0-5, 6-10) and ANOVA with factors treatment and strata for 0-10 days.

17MAR22,T05\_mild

## Supplement 8

### Full Table of Analysis of Variance for Days of Mild Symptoms Comparison of Days with WURSS-44 Scores of 0-3 for All Symptoms in Patients with Baseline WURSS-44 Q1 Score of 4-7

| Questionnaire Item               | Symptom Days | Treatment  | N   | LS Mean | Std Error | 95% c.i. |       | Treatment Comparison |           |          |       | P-Value |  |
|----------------------------------|--------------|------------|-----|---------|-----------|----------|-------|----------------------|-----------|----------|-------|---------|--|
|                                  |              |            |     |         |           | Lower    | Upper | Difference           |           | 95% c.i. |       |         |  |
|                                  |              |            |     |         |           |          |       | LS Mean              | Std Error | Lower    | Upper |         |  |
| 37: Breathe easily               | 0-5          | Treatment  | 35  | 21.31   | 1.33      | 18.65    | 23.98 |                      |           |          |       |         |  |
|                                  |              | Control    | 29  | 22.48   | 1.46      | 19.56    | 25.41 |                      |           |          |       |         |  |
|                                  |              | Difference | 64  |         |           |          |       | -1.17                | 1.98      | -5.12    | 2.79  | 0.557   |  |
|                                  | 5-10         | Treatment  | 13  | 21.15   | 2.68      | 15.66    | 26.65 |                      |           |          |       |         |  |
|                                  |              | Control    | 17  | 20.94   | 2.35      | 16.13    | 25.75 |                      |           |          |       |         |  |
|                                  |              | Difference | 30  |         |           |          |       | 0.21                 | 3.57      | -7.09    | 7.52  | 0.953   |  |
|                                  | 0-10         | Treatment  | 48  | 21.07   | 1.29      | 18.50    | 23.63 |                      |           |          |       |         |  |
|                                  |              | Control    | 46  | 21.80   | 1.27      | 19.28    | 24.32 |                      |           |          |       |         |  |
|                                  |              | Difference | 94  |         |           |          |       | -0.73                | 1.75      | -4.21    | 2.75  | 0.678   |  |
| 38: Walk, climb stairs, exercise | 0-5          | Treatment  | 39  | 21.97   | 1.22      | 19.55    | 24.40 |                      |           |          |       |         |  |
|                                  |              | Control    | 47  | 20.83   | 1.11      | 18.62    | 23.04 |                      |           |          |       |         |  |
|                                  |              | Difference | 86  |         |           |          |       | 1.14                 | 1.65      | -2.14    | 4.43  | 0.490   |  |
|                                  | 5-10         | Treatment  | 20  | 20.15   | 2.15      | 15.79    | 24.51 |                      |           |          |       |         |  |
|                                  |              | Control    | 19  | 18.42   | 2.21      | 13.95    | 22.89 |                      |           |          |       |         |  |
|                                  |              | Difference | 39  |         |           |          |       | 1.73                 | 3.08      | -4.51    | 7.97  | 0.578   |  |
|                                  | 0-10         | Treatment  | 59  | 21.01   | 1.10      | 18.83    | 23.20 |                      |           |          |       |         |  |
|                                  |              | Control    | 66  | 19.69   | 1.07      | 17.57    | 21.81 |                      |           |          |       |         |  |
|                                  |              | Difference | 125 |         |           |          |       | 1.33                 | 1.48      | -1.60    | 4.26  | 0.371   |  |
| 39: Accomplish daily activities  | 0-5          | Treatment  | 45  | 22.00   | 1.13      | 19.75    | 24.25 |                      |           |          |       |         |  |
|                                  |              | Control    | 45  | 19.96   | 1.13      | 17.70    | 22.21 |                      |           |          |       |         |  |
|                                  |              | Difference | 90  |         |           |          |       | 2.04                 | 1.60      | -1.14    | 5.23  | 0.206   |  |
|                                  | 5-10         | Treatment  | 21  | 19.52   | 2.04      | 15.39    | 23.66 |                      |           |          |       |         |  |
|                                  |              | Control    | 18  | 19.22   | 2.20      | 14.76    | 23.69 |                      |           |          |       |         |  |
|                                  |              | Difference | 39  |         |           |          |       | 0.30                 | 3.00      | -5.78    | 6.39  | 0.921   |  |
|                                  | 0-10         | Treatment  | 66  | 20.91   | 1.04      | 18.85    | 22.97 |                      |           |          |       |         |  |
|                                  |              | Control    | 63  | 19.39   | 1.08      | 17.26    | 21.53 |                      |           |          |       |         |  |
|                                  |              | Difference | 129 |         |           |          |       | 1.52                 | 1.43      | -1.32    | 4.36  | 0.291   |  |

---

\*p<0.05 by one-way ANOVA within symptom day strata (0-5, 6-10) and ANOVA with factors treatment and strata for 0-10 days.

17MAR22,T05\_mild

## Supplement 8

### Full Table of Analysis of Variance for Days of Mild Symptoms Comparison of Days with WURSS-44 Scores of 0-3 for All Symptoms in Patients with Baseline WURSS-44 Q1 Score of 4-7

| Questionnaire Item        | Symptom Days | Treatment  | N   | LS Mean | Std Error | 95% c.i. |       | Treatment Comparison |           |          |       |         |  |
|---------------------------|--------------|------------|-----|---------|-----------|----------|-------|----------------------|-----------|----------|-------|---------|--|
|                           |              |            |     |         |           | Lower    | Upper | Difference           |           | 95% c.i. |       | P-Value |  |
|                           |              |            |     |         |           |          |       | LS Mean              | Std Error | Lower    | Upper |         |  |
| 40: Work outside the home | 0-5          | Treatment  | 41  | 20.37   | 1.31      | 17.77    | 22.96 |                      |           |          |       |         |  |
|                           |              | Control    | 47  | 18.28   | 1.22      | 15.85    | 20.70 |                      |           |          |       |         |  |
|                           |              | Difference | 88  |         |           |          |       | 2.09                 | 1.79      | -1.46    | 5.64  | 0.246   |  |
|                           | 5-10         | Treatment  | 22  | 19.27   | 2.05      | 15.11    | 23.43 |                      |           |          |       |         |  |
|                           |              | Control    | 17  | 16.06   | 2.33      | 11.33    | 20.79 |                      |           |          |       |         |  |
|                           |              | Difference | 39  |         |           |          |       | 3.21                 | 3.11      | -3.09    | 9.51  | 0.308   |  |
|                           | 0-10         | Treatment  | 63  | 19.74   | 1.13      | 17.51    | 21.97 |                      |           |          |       |         |  |
|                           |              | Control    | 64  | 17.31   | 1.16      | 15.01    | 19.61 |                      |           |          |       |         |  |
|                           |              | Difference | 127 |         |           |          |       | 2.43                 | 1.56      | -0.65    | 5.51  | 0.121   |  |
| 41: Work inside the home  | 0-5          | Treatment  | 41  | 21.34   | 1.32      | 18.72    | 23.96 |                      |           |          |       |         |  |
|                           |              | Control    | 45  | 20.64   | 1.26      | 18.14    | 23.14 |                      |           |          |       |         |  |
|                           |              | Difference | 86  |         |           |          |       | 0.70                 | 1.82      | -2.92    | 4.32  | 0.703   |  |
|                           | 5-10         | Treatment  | 20  | 19.15   | 2.08      | 14.93    | 23.37 |                      |           |          |       |         |  |
|                           |              | Control    | 19  | 19.47   | 2.14      | 15.14    | 23.80 |                      |           |          |       |         |  |
|                           |              | Difference | 39  |         |           |          |       | -0.32                | 2.98      | -6.37    | 5.72  | 0.914   |  |
|                           | 0-10         | Treatment  | 61  | 20.33   | 1.15      | 18.06    | 22.61 |                      |           |          |       |         |  |
|                           |              | Control    | 64  | 19.96   | 1.14      | 17.70    | 22.21 |                      |           |          |       |         |  |
|                           |              | Difference | 125 |         |           |          |       | 0.38                 | 1.55      | -2.70    | 3.45  | 0.808   |  |
| 42: Interact with others  | 0-5          | Treatment  | 43  | 21.16   | 1.28      | 18.63    | 23.70 |                      |           |          |       |         |  |
|                           |              | Control    | 46  | 19.13   | 1.23      | 16.68    | 21.58 |                      |           |          |       |         |  |
|                           |              | Difference | 89  |         |           |          |       | 2.03                 | 1.77      | -1.50    | 5.56  | 0.255   |  |
|                           | 5-10         | Treatment  | 20  | 20.10   | 1.99      | 16.06    | 24.14 |                      |           |          |       |         |  |
|                           |              | Control    | 18  | 18.22   | 2.10      | 13.96    | 22.48 |                      |           |          |       |         |  |
|                           |              | Difference | 38  |         |           |          |       | 1.88                 | 2.90      | -3.99    | 7.75  | 0.521   |  |
|                           | 0-10         | Treatment  | 63  | 20.65   | 1.11      | 18.44    | 22.85 |                      |           |          |       |         |  |
|                           |              | Control    | 64  | 18.66   | 1.12      | 16.44    | 20.88 |                      |           |          |       |         |  |
|                           |              | Difference | 127 |         |           |          |       | 1.99                 | 1.51      | -1.00    | 4.97  | 0.191   |  |

---

\*p<0.05 by one-way ANOVA within symptom day strata (0-5, 6-10) and ANOVA with factors treatment and strata for 0-10 days.

17MAR22,T05\_mild

## Supplement 8

### Full Table of Analysis of Variance for Days of Mild Symptoms Comparison of Days with WURSS-44 Scores of 0-3 for All Symptoms in Patients with Baseline WURSS-44 Q1 Score of 4-7

| Questionnaire Item          | Symptom Days | Treatment  | N   | LS Mean | Std Error | 95% c.i. |       | Treatment Comparison |           |          |       |         |
|-----------------------------|--------------|------------|-----|---------|-----------|----------|-------|----------------------|-----------|----------|-------|---------|
|                             |              |            |     |         |           | Lower    | Upper | Difference           |           | 95% c.i. |       | P-Value |
|                             |              |            |     |         |           |          |       | LS Mean              | Std Error | Lower    | Upper |         |
| 43: Live your personal life | 0-5          | Treatment  | 45  | 20.16   | 1.24      | 17.70    | 22.61 |                      |           |          |       |         |
|                             |              | Control    | 51  | 19.02   | 1.16      | 16.71    | 21.33 |                      |           |          |       |         |
|                             |              | Difference | 96  |         |           |          |       | 1.14                 | 1.70      | -2.24    | 4.51  | 0.505   |
|                             | 5-10         | Treatment  | 20  | 17.75   | 1.94      | 13.82    | 21.68 |                      |           |          |       |         |
|                             |              | Control    | 20  | 19.45   | 1.94      | 15.52    | 23.38 |                      |           |          |       |         |
|                             |              | Difference | 40  |         |           |          |       | -1.70                | 2.75      | -7.26    | 3.86  | 0.540   |
|                             | 0-10         | Treatment  | 65  | 19.23   | 1.09      | 17.08    | 21.38 |                      |           |          |       |         |
|                             |              | Control    | 71  | 18.93   | 1.06      | 16.84    | 21.02 |                      |           |          |       |         |
|                             |              | Difference | 136 |         |           |          |       | 0.30                 | 1.44      | -2.56    | 3.16  | 0.836   |

\*p<0.05 by one-way ANOVA within symptom day strata (0-5, 6-10) and ANOVA with factors treatment and strata for 0-10 days.

17MAR22,T05\_mild
